# Supplementary material
Source: MDPI journal article supplement (https://www.mdpi.com/2072-4292/14/22/5887)
Supplement: s1 [file s1 › remotesensing-1987363-supplementary.pdf]

Supplementary figures of 'Evaluating Satellite-Observed Ecosystem Function Changes and the Interaction with Drought in Songnen Plain, Northeast China'

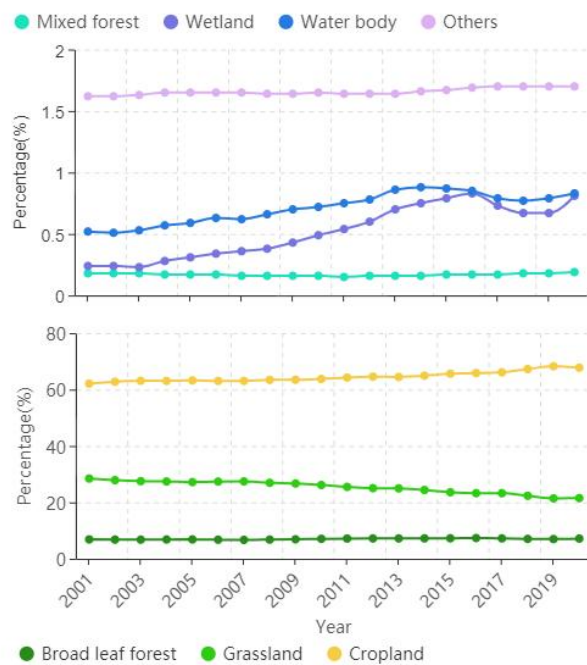

Figure S1. Area changes of major land use/cover during 2001–2020.

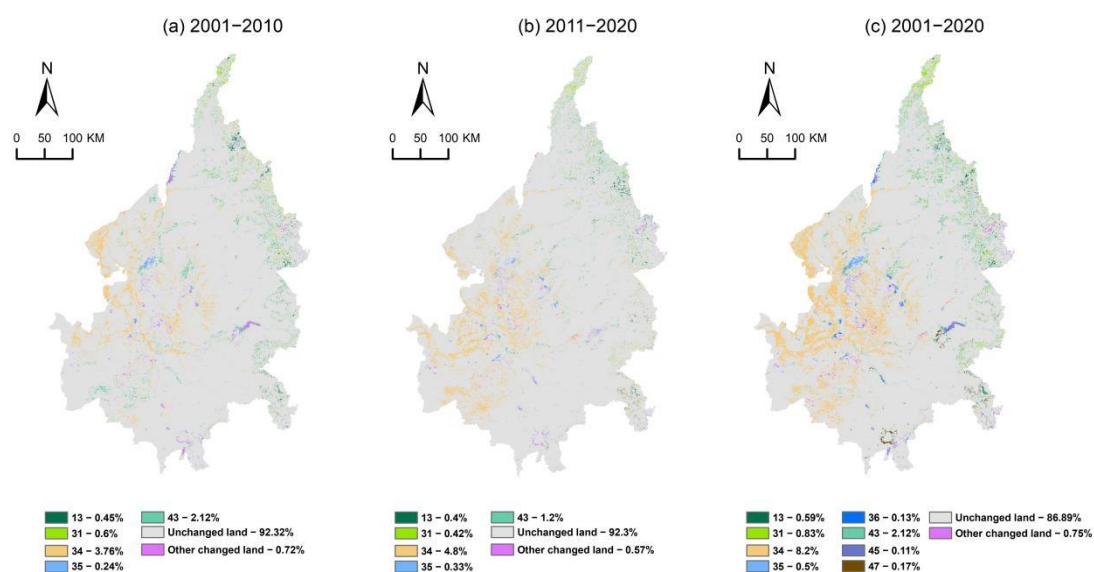

**Figure S2.** Spatial distribution and the area percentage of major land use type change types over three different periods in the Songnen Plain: (a) 2001–2010, (b) 2011–2020, (c) 2001–2020. The first of the two numbers in the legend represents the land use type in the starting year and the second represents that in the ending year. 1 denotes Deciduous broadleaf forest, 3 is Grassland, 4 is Cropland, 5 is Wetland, 6 is Water body and 7 is Others. For instance, 34 represents the changes from grassland to cropland. The categories with the number of pixels less than 0.01% of the total pixels were classified as Other changed land.

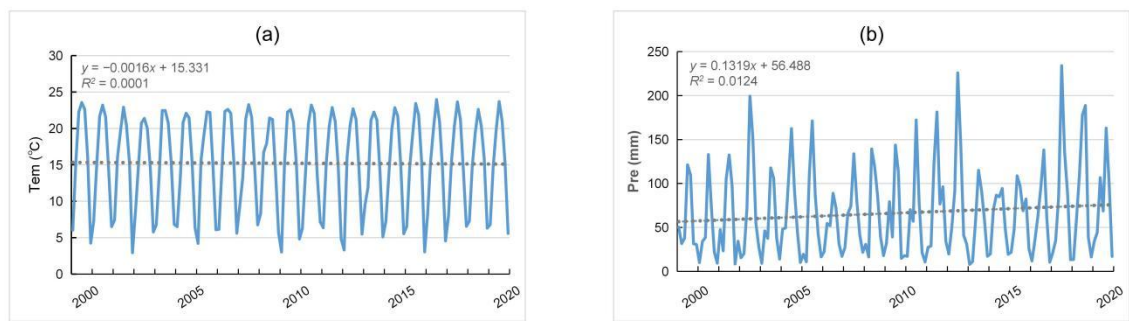

**Figure S3.** Change trends of : (a) Temperature, (b) Precipitation from 2000 to 2020.

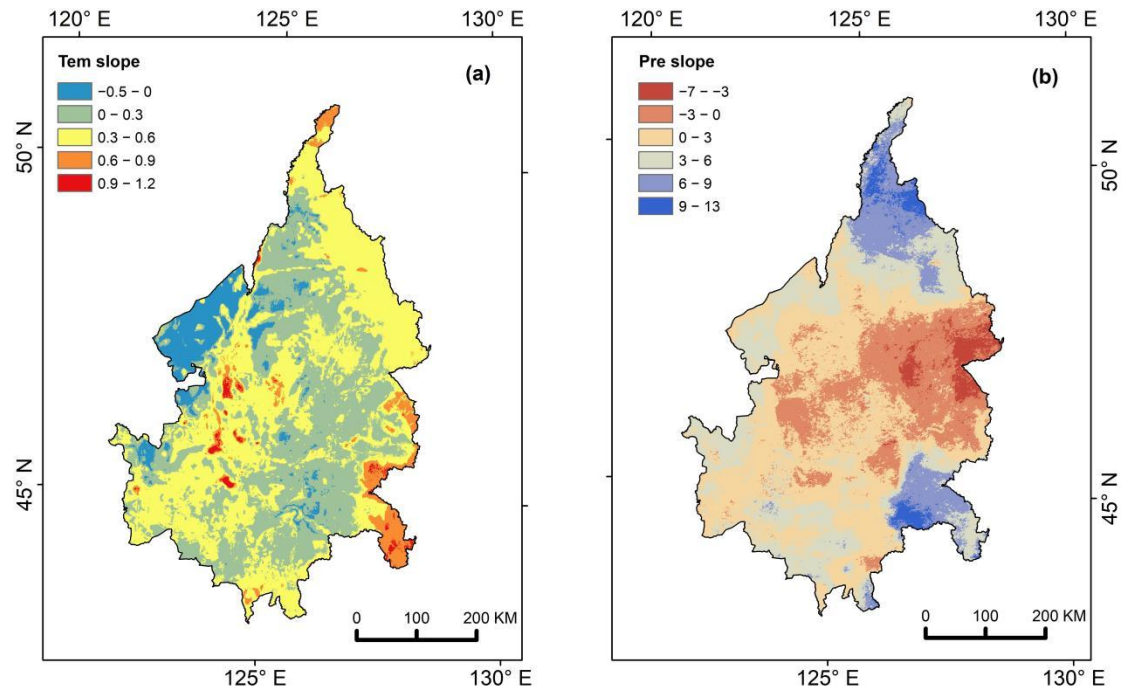

**Figure S4.** Spatial distribution of : (a) Temperature, (b) Precipitation from 2000 to 2020. ( $p < 0.05$ )
